# Supplementary material for: Magnetic resonance imaging/fluorescence dual modality protocol using designed phosphonate ligands coupled to superparamagnetic iron oxide nanoparticles
Source: Royal Society of Chemistry journal article supplement (doi:10.1039/c6tb00821f), 2016-01-01
Supplement: c6tb00821f1.pdf [file c6tb00821f1.pdf]

## Supplementary Information:

### Magnetic Resonance Imaging/Fluorescence Dual Modality Protocol Using Designed Phosphonate Ligands Coupled to Superparamagnetic Iron Oxide Nanoparticles

Tina Lam,<sup>a</sup> Pramod K Avti,<sup>a,b,c</sup> Philippe Pouliot,<sup>b,c</sup> Jean-Claude Tardif,<sup>c</sup> Éric Rhéaume,<sup>c,\*</sup> Frederic Lesage<sup>b,c,\*</sup> and Ashok K. Kakkar<sup>a,\*</sup>

<sup>a</sup>Department of Chemistry, McGill University, 801 Sherbrooke St, West, Montreal, Quebec H3A 0B8, Canada. E-mail: [ashok.kakkar@mcgill.ca](mailto:ashok.kakkar@mcgill.ca). Phone: +514-398-6912

<sup>b</sup>Dept. of Electrical Engineering École Polytechnique de Montréal, C.P. 6079 succ. Centre-ville, Montreal H3C 3A7, Quebec, Canada. E-mail: [frederic.lesage@polymtl.ca](mailto:frederic.lesage@polymtl.ca)

<sup>c</sup>Research Center, Montreal Heart Institute, 5000 Bélanger Street, Montreal H1T 1C8, Quebec, Canada; Department of Medicine, Université de Montréal, Montréal, Quebec, Canada. E-mail: [eric.rheaume@icm-mhi.org](mailto:eric.rheaume@icm-mhi.org)

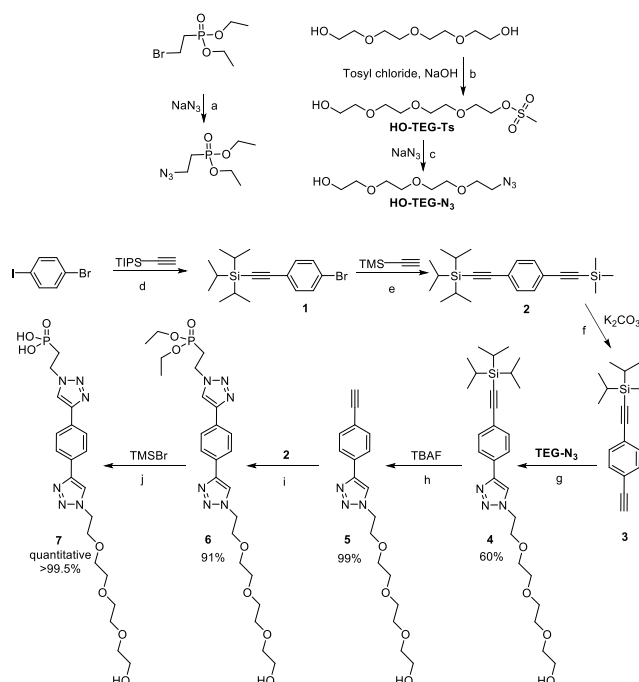

Scheme 1. Synthesis of the Linear Linker. Reaction Conditions: a) EtOH, Ar atmosphere, reflux overnight; b) THF, Ar atmosphere, 0°C 2 hrs c) EtOH, Ar atmosphere, 77°C overnight; d) Pd(TPP)<sub>2</sub>Cl<sub>2</sub>, Cul, DEA, Ar atmosphere, r.t. overnight; e) Pd(TPP)<sub>2</sub>Cl<sub>2</sub>, Cul, TEA, Benzene, Ar atmosphere, reflux overnight; f) acetone:water:THF(1:1:1), r.t. overnight; g) CuSO<sub>4</sub>·5H<sub>2</sub>O, Na Ascorbate, water:THF (0.5:1), Ar atmosphere, r.t. overnight; h) dry ice/acetone bath, Ar atmosphere overnight; i) CuSO<sub>4</sub>·5H<sub>2</sub>O, Na Ascorbate, water:THF (0.5:1), Ar atmosphere, r.t. overnight; j) Dry chloroform, Ar atmosphere, r.t. 48 hrs

Scheme S1 Design and Synthesis of Phosphonate-TEG-OH. Synthesis was adapted from T. Lam, P.K. Avti, P. Pouliot, F. Maafi, J-C. Tardif, E. Rheaume, F. Lesage and A. Kakkar, *Langmuir*, 2016, submitted for publication.

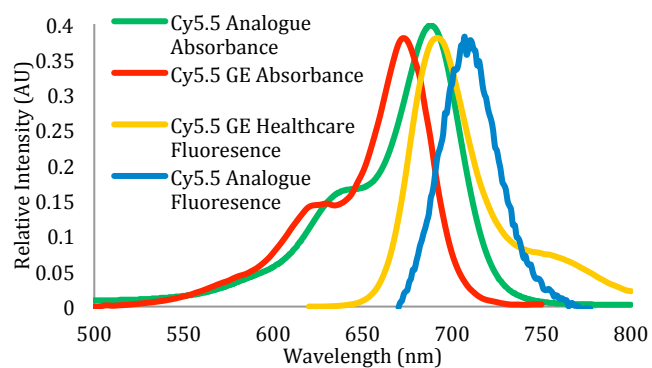

Figure S2: Relative absorbance and emission spectral overlay for Cy5.5 (GE Healthcare) and Cy5.5 analogue (Cy5.5A) in DMSO.

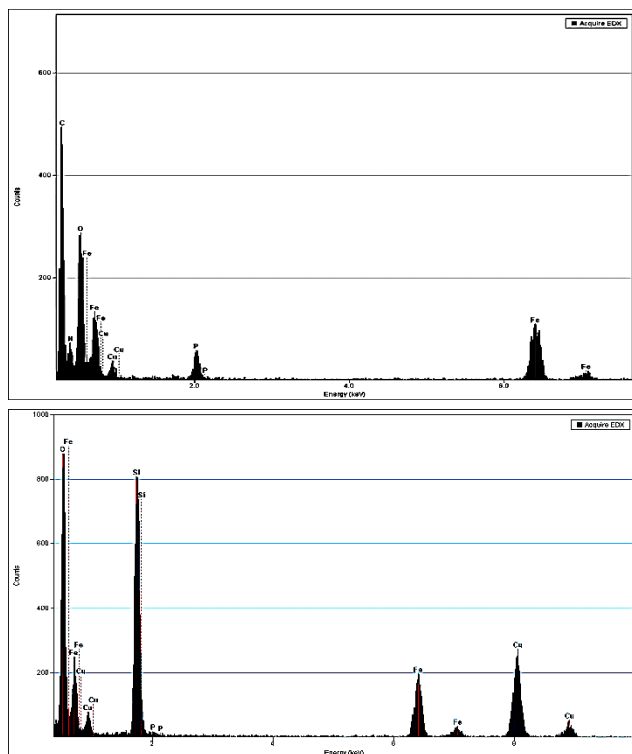

Figure S3: EDX images of SPIONs-TEG-OH (Top) and SPIONs-PEG-OH (Bottom)

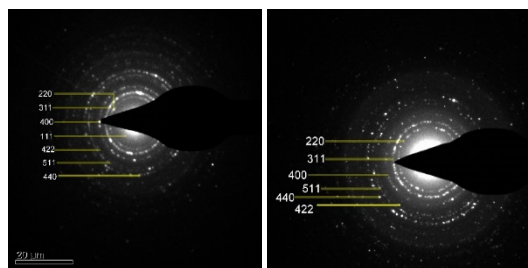

Figure S4: SAED images for SPIONs-TEG-OH (Left) and SPIONs-PEG-OH (Right).

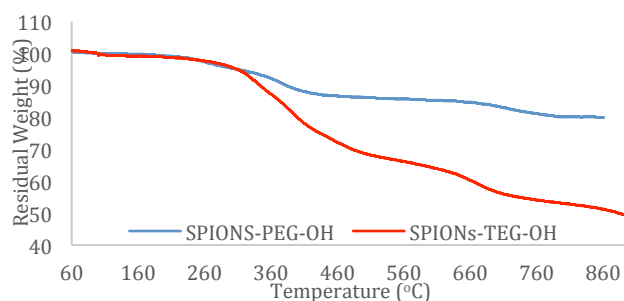

Figure S5: TGA spectral overlay of weight loss at increasing temperatures for SPIONs-TEG-OH and SPIONs-PEG-OH.

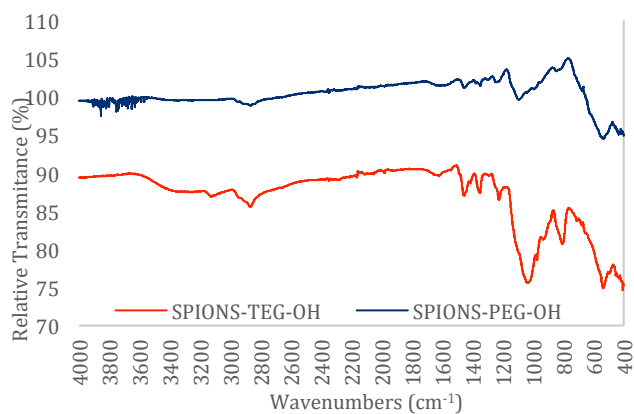

Figure S6: FTIR spectral overlay for SPIONs-TEG-OH and SPIONs-PEG-OH.

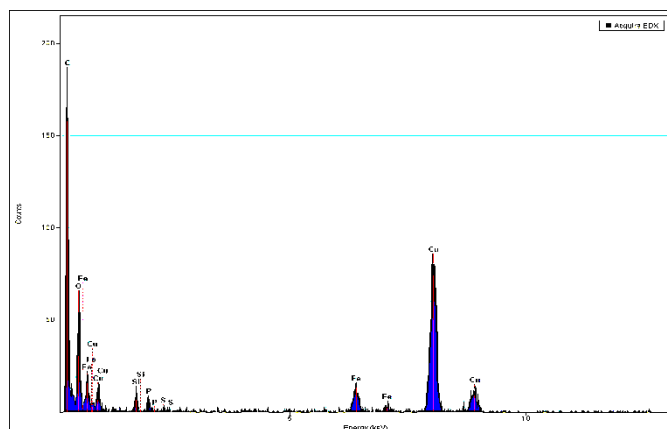

Figure S7: EDX for SPIONs-PEG-O-Cy5.5A.

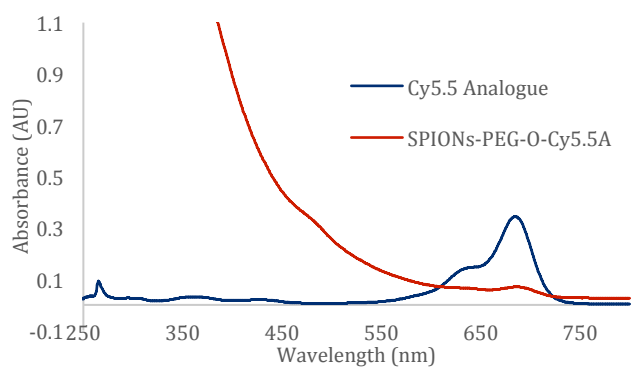

Figure S8: UV-Vis spectral overlay of Cy5.5A and SPIONs-PEG-O-Cy5.5A in DMF.

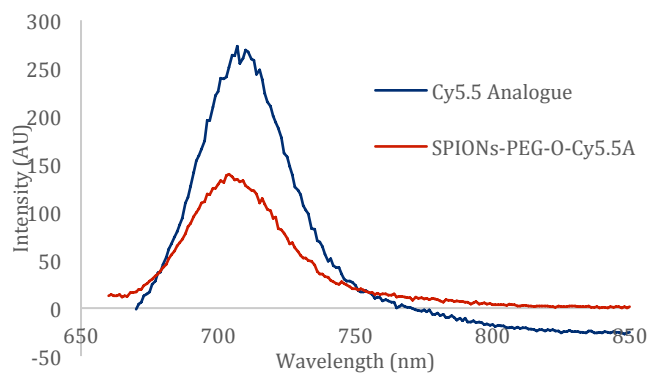

Figure S9: Fluorescence spectral overlay of Cy5.5A and SPIONs-PEG-O-Cy5.5A in DMF.

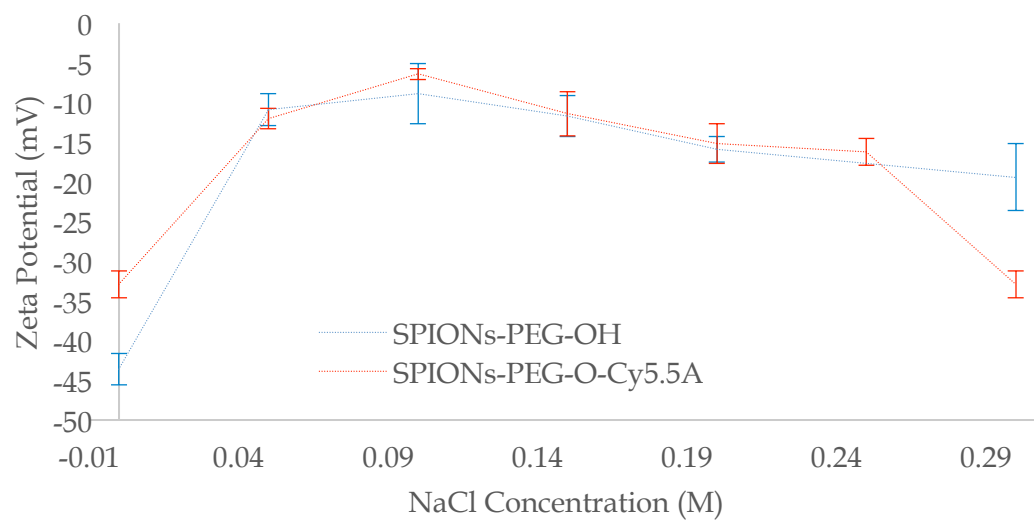

Figure **S10**: Zeta Potential values for SPIONs species at varying NaCl concentrations in water.
